# Supplementary material for: Genome-wide identification and expression analysis of the IQD gene family in moso bamboo (Phyllostachys edulis)
Source: PubMed Central journal article supplement (PMC4837358; doi:10.1038/srep24520), 2016-04-20
Supplement: srep24520-s1.pdf [file srep24520-s1.pdf]

**Genome-wide identification and expression analysis of the IQD gene family in moso bamboo (*Phyllostachys edulis*)**

**Min Wu<sup>1,2</sup>, Yuan Li<sup>2</sup>, Danmei Chen<sup>2</sup>, Huanlong Liu<sup>2</sup>, Dongyue Zhu<sup>2</sup>, Yan Xiang<sup>2\*</sup>**

**1** Key Laboratory of Crop Biology of Anhui Province, School of Life Sciences, Anhui Agricultural University, Hefei 230036, China

**2** Laboratory of Modern Biotechnology, School of Forestry and Landscape Architecture, Anhui Agricultural University, Hefei 230036, China

\*Corresponding Author

Yan Xiang

Laboratory of Modern Biotechnology, School of Forestry and Landscape Architecture, Anhui Agricultural University, Hefei 230036, China

Phone: 0551-65781786

Email: [xiangyanahau@sina.com](mailto:xiangyanahau@sina.com)

**Fig. S1. Amino acid sequence alignments of IQ67 domains in moso bamboo (*Phyllostachys edulis*) IQD protein sequences.** The multiple alignment results indicate the highly conserved IQD domains among the 29 identified moso bamboo IQD protein sequences. The shading of the alignment presents residues (white text) of the IQ motifs (brown), the 1-5-10 motifs (dark blue) and the 1-8-14 motifs (yellow).

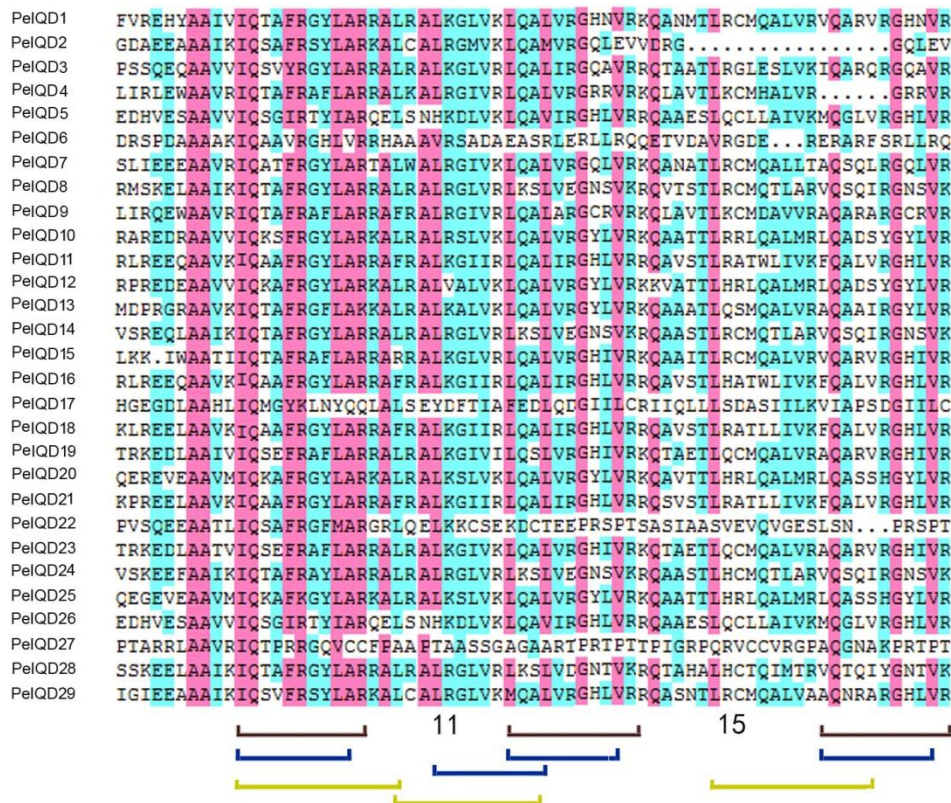

**Fig. S2. Sliding window plots of representative duplicated IQD genes in moso bamboo and between moso bamboo and rice, and, between moso bamboo and *Brachypodium*.** As shown in the key, dark grey blocks indicate the positions of the IQD domain. The window size was 150 bp, and the step size 9 bp.

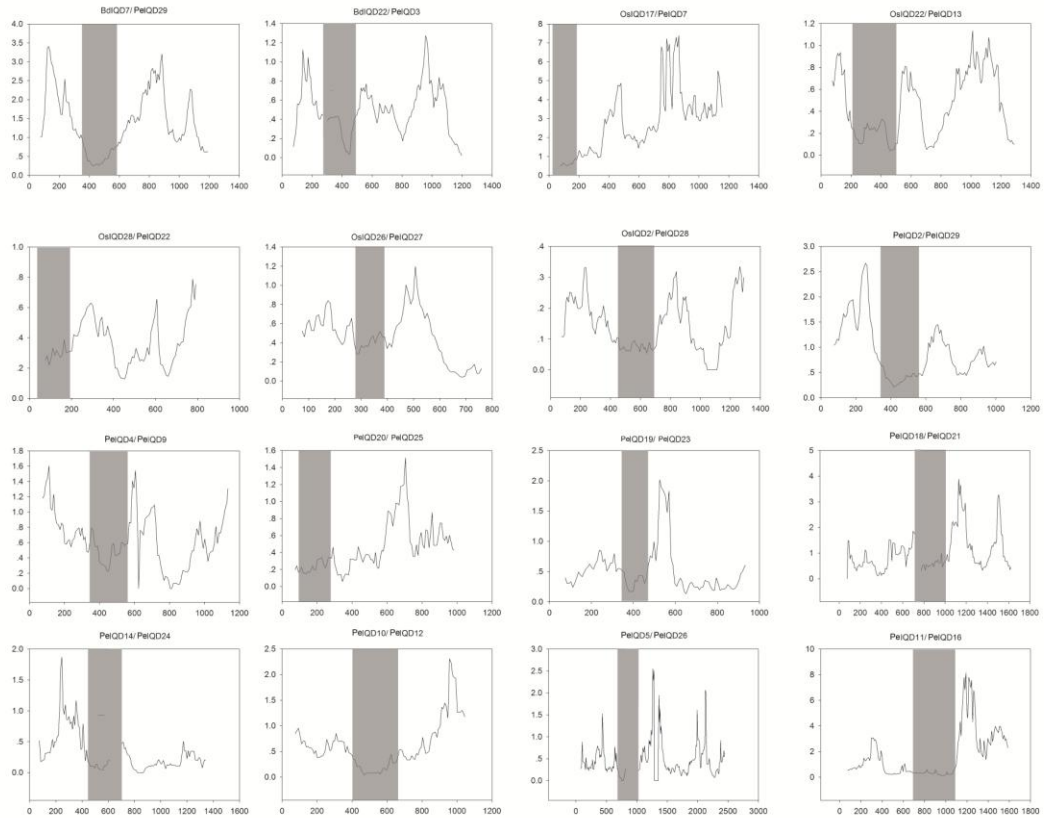

**Fig. S3. Self-activation of bait proteins in yeast.** Positive control, pGBKT7-53+ pGADT7-T; negative control, pGBKT7; experimental groups, pGBKT7-PeIQD8, pGBKT7-PeCaM2, pGBKT7-PeIQD8<sub>Del112-113</sub>, pGBKT7 PeIQD8<sub>I112T</sub>.

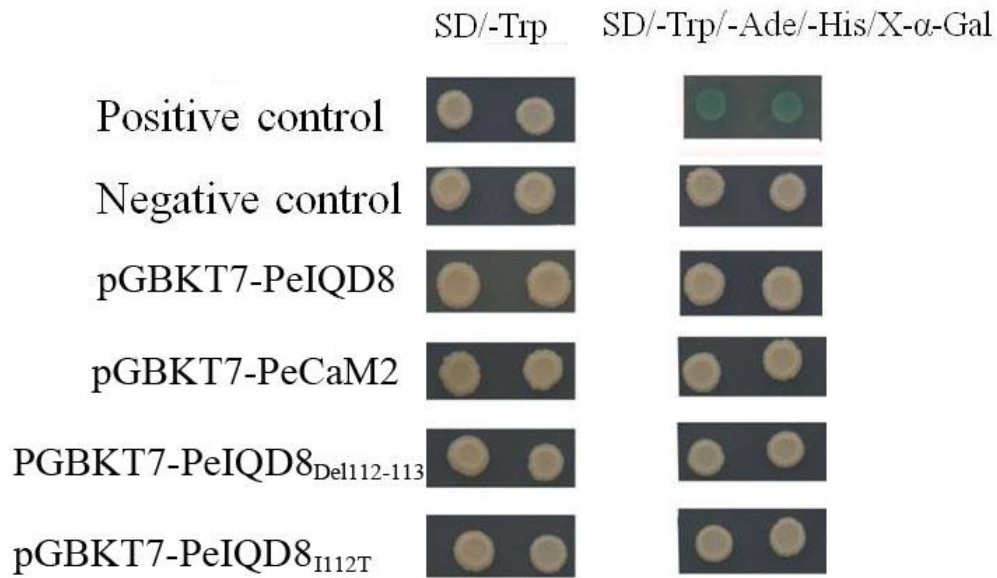

**Fig. S4. Amino acid sequence alignments of PeCaM2 and AtCaM2.** The multiple alignment results indicate the high similarity of the *PeCaM2* and *AtCaM2* protein sequences.

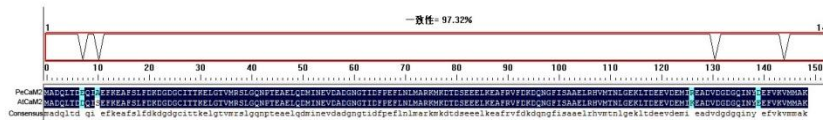

**Fig. S5. Expression patterns of 29 *PelIQD* genes under drought (PEG) stress, as revealed by qRT-PCR. The Y-axis indicates the relative expression levels. The X-axis indicates the time courses of stress treatments. Error bars,  $6 \pm SE$ .**

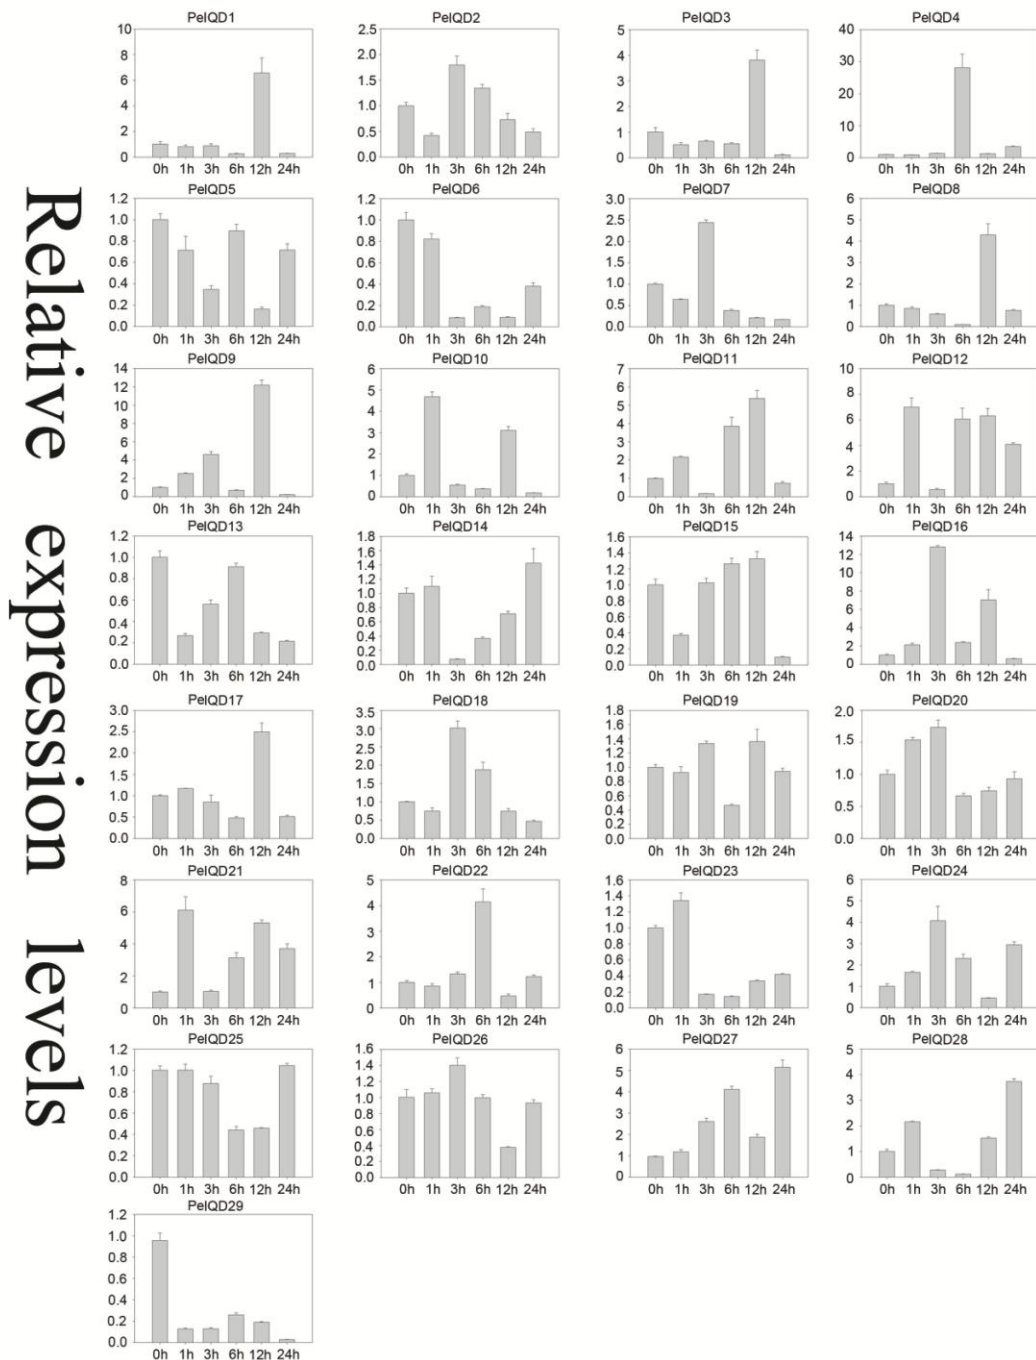

**Fig. S6. Expression patterns of 29 *PelQD* genes under MeJA stress, as revealed by qRT-PCR.** The Y-axis indicates the relative expression levels. The X-axis indicates the time courses of stress treatments. Error bars,  $6\pm SE$ .

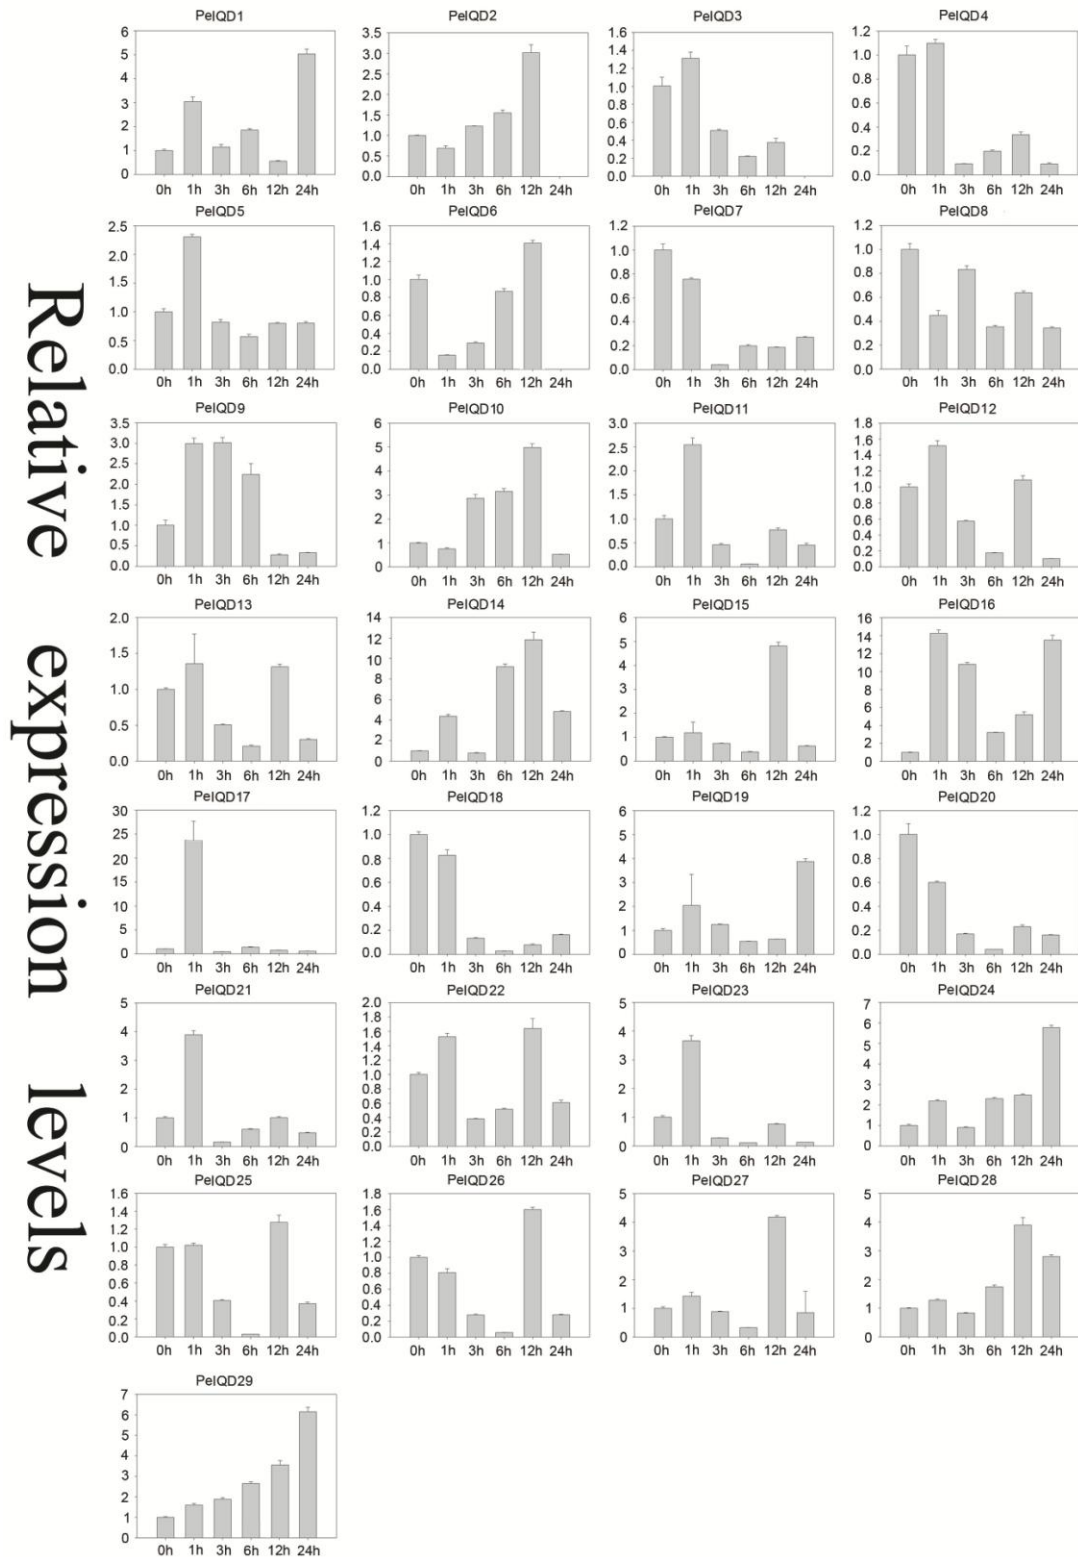

**Table S1. Detailed information about IQD proteins in *Arabidopsis*, rice, *Brachypodium*, *Populus*, tomato and soybean.**

| Gene name          | Sequence ID      | Location          | Chr | ORF length(bp) | Size(aa) | WoLF PSORT |
|--------------------|------------------|-------------------|-----|----------------|----------|------------|
| <i>Arabidopsis</i> |                  |                   |     |                |          |            |
| AtIQD1             | AT3G09710.1      | 2976605-2979389   | 3   | 1365           | 454      | N          |
| AtIQD2             | AT5G03040.1      | 710102-712788     | 5   | 1386           | 461      | N          |
| AtIQD3             | AT3G52290.1      | 19393819-19396403 | 3   | 1293           | 430      | ?          |
| AtIQD4             | AT2G26410.1      | 11234651-11236936 | 2   | 1584           | 527      | ?          |
| AtIQD5             | AT3G22190.1      | 7831280-7833904   | 3   | 1203           | 400      | N          |
| AtIQD6             | AT2G26180.1      | 11143290-11145103 | 2   | 1251           | 416      | N          |
| AtIQD7             | AT1G17480.1      | 6006461-6008266   | 1   | 1113           | 370      | ?          |
| AtIQD8             | AT1G72670.1      | 27356683-27358853 | 1   | 1245           | 414      | N          |
| AtIQD9             | AT2G33990.1      | 14360276-14362241 | 2   | 750            | 249      | N          |
| AtIQD10            | AT3G15050.1      | 5066879-5067960   | 3   | 780            | 259      | ?          |
| AtIQD11            | AT5G13460.1      | 4315759-4318360   | 5   | 1332           | 443      | N          |
| AtIQD12            | AT5G03960.1      | 1068260-1069978   | 5   | 1212           | 403      | ?          |
| AtIQD13            | AT3G59690.1      | 22048754-2205167  | 3   | 1854           | 617      | ?          |
| AtIQD14            | AT2G43680.2      | 18108349-18111831 | 2   | 2007           | 668      | ?          |
| AtIQD15            | AT3G49380.1      | 18311909-18313490 | 3   | 1059           | 352      | N          |
| AtIQD16            | AT4G10640.1      | 6571899-6574427   | 4   | 1272           | 423      | N          |
| AtIQD17            | AT4G00820.1      | 349116-351550     | 4   | 1605           | 534      | ?          |
| AtIQD18            | AT1G01110.2      | 52239-54692       | 1   | 1584           | 527      | N          |
| AtIQD19            | AT4G14750.1      | 8470381-8472187   | 4   | 1164           | 387      | ?          |
| AtIQD20            | AT3G51380.1      | 19074036-19074426 | 3   | 312            | 103      | M          |
| AtIQD21            | AT3G49260.1      | 18262399-18265979 | 3   | 1416           | 471      | N          |
| AtIQD22            | AT4G23060.1      | 12087203-12090575 | 4   | 1632           | 543      | ?          |
| AtIQD23            | AT5G62070.1      | 24929919-24932576 | 5   | 1212           | 403      | ?          |
| AtIQD24            | AT5G07240.1      | 2271919-2274288   | 5   | 1206           | 401      | ?          |
| AtIQD25            | AT4G29150.1      | 14378767-14380511 | 4   | 1152           | 383      | ?          |
| AtIQD26            | AT3G16490.1      | 5603900-5605697   | 3   | 1197           | 398      | ?          |
| AtIQD27            | AT1G51960.1      | 19310355-19311683 | 1   | 1056           | 351      | ?          |
| AtIQD28            | AT1G14380.1      | 4918010-4921596   | 1   | 1995           | 664      | N          |
| AtIQD29            | AT2G02790.1      | 787915-790946     | 2   | 1911           | 636      | N          |
| AtIQD30            | AT1G18840.1      | 6500848-6504413   | 1   | 1719           | 572      | N          |
| AtIQD31            | AT1G74690.1      | 28061159-28064625 | 1   | 1764           | 587      | ?          |
| AtIQD32            | AT1G19870.1      | 6895015-6898725   | 1   | 2385           | 794      | N          |
| AtIQD33            | AT5G35670.1      | 13856103-13858059 | 5   | 1329           | 442      | ?          |
| Rice               |                  |                   |     |                |          |            |
| OsIQD1             | LOC_Os05g03190.1 | 81361-85365       | 5   | 1425           | 474      | ?          |
| OsIQD2             | LOC_Os01g61720.8 | 106290-110032     | 1   | 1503           | 500      | N          |
| OsIQD3             | LOC_Os03g44610.1 | 118442-126461     | 3   | 1323           | 440      | N          |
| OsIQD4             | LOC_Os03g57330.1 | 48853-52578       | 3   | 1269           | 422      | ?          |
| OsIQD5             | LOC_Os01g09790.1 | 152586-155207     | 1   | 1329           | 442      | ?          |
| OsIQD6             | LOC_Os05g38790.1 | 23568-26042       | 5   | 1617           | 538      | N          |
| OsIQD7             | LOC_Os06g06160.1 | 90441-94332       | 6   | 1062           | 353      | N          |
| OsIQD8             | LOC_Os12g42430.3 | 133867-139274     | 12  | 1329           | 442      | ?          |
| OsIQD9             | LOC_Os01g51230.1 | 7612-9986         | 1   | 1326           | 441      | ?          |
| OsIQD10            | LOC_Os05g46350.1 | 37570-40338       | 5   | 1227           | 408      | ?          |
| OsIQD11            | LOC_Os05g46350.1 | 15479-17371       | 1   | 1692           | 563      | ?          |
| OsIQD12            | LOC_Os06g23380.1 | 18921-22322       | 6   | 1413           | 470      | N          |
| OsIQD13            | LOC_Os02g19640.1 | 59894-65564       | 2   | 1458           | 485      | ?          |
| OsIQD14            | LOC_Os08g02250.1 | 88345-90355       | 8   | 1632           | 543      | ?          |
| OsIQD15            | LOC_Os04g48160.1 | 151253-153796     | 4   | 1395           | 464      | N          |
| OsIQD16            | LOC_Os03g43580.1 | 144176-145684     | 3   | 1344           | 447      | ?          |
| OsIQD17            | LOC_Os03g06570.1 | 135566-136967     | 3   | 1254           | 417      | ?          |
| OsIQD18            | LOC_Os10g28420.1 | 17834-19903       | 10  | 1458           | 485      | ?          |
| OsIQD19            | LOC_Os05g44630.1 | 24971333-24973284 | 5   | 1104           | 367      | N          |
| OsIQD20            | LOC_Os01g53980.1 | 95943-99625       | 1   | 1737           | 578      | ?          |

|                     |                  |                   |    |      |     |   |
|---------------------|------------------|-------------------|----|------|-----|---|
| OsIQD21             | LOC_Os05g09520.1 | 45436-47015       | 5  | 1494 | 497 | ? |
| OsIQD22             | LOC_Os01g09470.1 | 70239-72382       | 1  | 1398 | 465 | N |
| OsIQD23             | LOC_Os05g45930.1 | 54441-58756       | 5  | 1725 | 574 | N |
| OsIQD24             | LOC_Os01g51840.1 | 38561-44222       | 1  | 1725 | 574 | N |
| OsIQD25             | LOC_Os04g56740   | 85710-91604       | 4  | 2682 | 893 | N |
| OsIQD26             | LOC_Os03g04210   | 57690-58691       | 3  | 912  | 303 | N |
| OsIQD27             | LOC_Os04m04570   | 27592940-27594955 | 4  | 1107 | 368 | ? |
| OsIQD28             | LOC_Os06g40850.1 | 329-2234          | 6  | 1209 | 432 | N |
| <i>Brachypodium</i> |                  |                   |    |      |     |   |
| BdIQD1              | Bradi4g01360.2   | 869983-875532     | 4  | 1308 | 435 | N |
| BdIQD2              | Bradi2g05680.1   | 4160734-4162695   | 2  | 1482 | 493 | M |
| BdIQD3              | Bradi2g05840.1   | 4350695-4353358   | 2  | 1320 | 439 | M |
| BdIQD4              | Bradi1g06350.1   | 4255837-4260120   | 1  | 1248 | 415 | N |
| BdIQD5              | Bradi1g13650.3   | 10494438-10501428 | 1  | 1260 | 419 | N |
| BdIQD6              | Bradi3g13710.1   | 12184580-12187933 | 3  | 1752 | 583 | C |
| BdIQD7              | Bradi1g14090.1   | 10991279-10993725 | 1  | 1392 | 463 | C |
| BdIQD8              | Bradi2g18220.1   | 16134114-16136622 | 2  | 1308 | 435 | N |
| BdIQD9              | Bradi2g18640.2   | 16526685-16532110 | 2  | 1731 | 576 | C |
| BdIQD10             | Bradi5g18767.1   | 21961423-21963974 | 5  | 1356 | 451 | N |
| BdIQD11             | Bradi2g19410.1   | 17078761-17081761 | 2  | 1107 | 368 | N |
| BdIQD12             | Bradi3g26990.1   | 27763162-27766280 | 3  | 1431 | 476 | N |
| BdIQD13             | Bradi2g33370.1   | 33463747-33465745 | 2  | 1419 | 472 | N |
| BdIQD14             | Bradi1g36140.1   | 31926928-31929055 | 1  | 1311 | 436 | N |
| BdIQD15             | Bradi2g37980.2   | 38342608-38346663 | 2  | 1425 | 474 | N |
| BdIQD16             | Bradi2g47867.1   | 48270948-48274013 | 2  | 1281 | 426 | N |
| BdIQD17             | Bradi2g48210.2   | 48526630-48531648 | 2  | 1665 | 554 | N |
| BdIQD18             | Bradi1g49070.2   | 48055425-48059038 | 1  | 1023 | 340 | N |
| BdIQD19             | Bradi2g49490.1   | 49598263-49600689 | 2  | 1173 | 390 | N |
| BdIQD20             | Bradi2g54170.2   | 53142697-53147456 | 2  | 1479 | 492 | N |
| BdIQD21             | Bradi2g57567.1   | 55747039-55750930 | 2  | 1734 | 577 | C |
| BdIQD22             | Bradi1g62220.1   | 61752750-61756461 | 1  | 1467 | 491 | N |
| BdIQD23             | Bradi1g74410.1   | 71905417-71907676 | 1  | 1233 | 410 | N |
| <i>Populus</i>      |                  |                   |    |      |     |   |
| PtIQD1              | Potri.001G021000 | 1607742-1610595   | 1  | 1395 | 464 | C |
| PtIQD2              | Potri.001G108800 | 8650631-8655082   | 1  | 1434 | 477 | N |
| PtIQD3              | Potri.001G190500 | 17147397-17151292 | 1  | 1236 | 411 | N |
| PtIQD4              | Potri.001G215200 | 21798241-21805654 | 1  | 1314 | 437 | M |
| PtIQD5              | Potri.001G375700 | 39064696-39069035 | 1  | 909  | 302 | N |
| PtIQD6              | Potri.001G448100 | 48222177-48224324 | 1  | 1389 | 462 | N |
| PtIQD7              | Potri.002G025200 | 1586081-1591447   | 2  | 2445 | 814 | N |
| PtIQD8              | Potri.002G178500 | 13811073-13813833 | 2  | 1671 | 556 | N |
| PtIQD9              | Potri.003G042700 | 5706743-5709706   | 3  | 1332 | 443 | N |
| PtIQD10             | Potri.003G047800 | 6990533-6993068   | 3  | 1230 | 409 | N |
| PtIQD11             | Potri.003G122800 | 14483539-14488038 | 3  | 1431 | 476 | C |
| PtIQD12             | Potri.004G053000 | 4153576-4157021   | 4  | 939  | 312 | C |
| PtIQD13             | Potri.005G051500 | 3687165-3689335   | 5  | 1014 | 337 | N |
| PtIQD14             | Potri.005G106300 | 8150665-8151156   | 5  | 408  | 135 | N |
| PtIQD15             | Potri.005G236200 | 24358919-24365526 | 5  | 2460 | 819 | N |
| PtIQD16             | Potri.006G046000 | 3264556-3268258   | 6  | 1296 | 431 | N |
| PtIQD17             | Potri.006G131100 | 10742805-10746955 | 6  | 1440 | 479 | N |
| PtIQD18             | Potri.006G131100 | 23817184-23820667 | 6  | 1257 | 418 | N |
| PtIQD19             | Potri.008G156700 | 10615675-10618176 | 8  | 1308 | 435 | N |
| PtIQD20             | Potri.009G015800 | 2662464-2669160   | 9  | 1332 | 443 | N |
| PtIQD21             | Potri.010G082600 | 10880956-10883713 | 10 | 1293 | 430 | N |
| PtIQD22             | Potri.010G218100 | 20440978-20445678 | 10 | 1470 | 489 | N |
| PtIQD23             | Potri.011G063200 | 5770289-5773023   | 11 | 939  | 312 | N |
| PtIQD24             | Potri.011G096500 | 11757480-11761074 | 11 | 912  | 303 | M |
| PtIQD25             | Potri.011G153400 | 17201694-17204132 | 11 | 1659 | 552 | N |
| PtIQD26             | Potri.012G016200 | 1564728-1567623   | 12 | 1398 | 465 | C |
| PtIQD27             | Potri.012G022500 | 1980877-1985207   | 12 | 1716 | 571 | N |
| PtIQD28             | Potri.012G069900 | 9347701-9354581   | 12 | 1863 | 620 | C |
| PtIQD29             | Potri.012G139800 | 15401076-15406028 | 12 | 1368 | 455 | C |
| PtIQD30             | Potri.013G038900 | 2660734-2662179   | 13 | 591  | 196 | N |



|         |                    |                      |    |      |     |     |
|---------|--------------------|----------------------|----|------|-----|-----|
| PtIQD31 | Potri.013G127200   | 13984689-13990617    | 13 | 1587 | 528 | N   |
| PtIQD32 | Potri.014G104600   | 8221204-8223802      | 14 | 1677 | 558 | C   |
| PtIQD33 | Potri.015G005900   | 367350-369625        | 15 | 1554 | 517 | N   |
| PtIQD34 | Potri.015G012500   | 804149-807576        | 15 | 1383 | 460 | E.R |
| PtIQD35 | Potri.015G063600   | 8766252-8772461      | 15 | 1779 | 592 | C   |
| PtIQD36 | Potri.015G142200   | 14886292-14891121    | 15 | 1356 | 451 | C   |
| PtIQD37 | Potri.016G086300   | 6805977-6809919      | 16 | 1437 | 478 | N   |
| PtIQD38 | Potri.017G079600   | 9337863-9340813      | 17 | 1422 | 473 | N   |
| PtIQD39 | Potri.018G062000   | 7657258-7659644      | 18 | 1242 | 413 | N   |
| PtIQD40 | Potri.019G095700   | 12681872-12687989    | 19 | 1593 | 530 | N   |
| tomato  |                    |                      |    |      |     |     |
| SUN     |                    | SL2.40ch07-2395262   | 7  | 1226 | 421 | N   |
| SISUN1  | Solyc10g079240.1.1 | 60140568-60142797(+) | 10 | 1226 | 421 | N   |
| SISUN2  | Solyc01g009340     | 3537789-3541754(+)   | 1  | 1521 | 506 | N   |
| SISUN3  | Solyc01g088250.2.1 | 74824669-74827406(+) | 1  | 1377 | 458 | N   |
| SISUN4  | Solyc01g097490     | 80081666-80082520(+) | 1  | 1233 | 410 | N   |
| SISUN5  | Solyc02g077260.2.1 | 36828296-36831764(-) | 2  | 909  | 302 | N   |
| SISUN6  | SL1.00sc00090_96   | 41309977-41310589(+) | 2  | 387  | 128 | M   |
| SISUN7  | Solyc02g087760.2.1 | 44643248-44648496(+) | 2  | 1671 | 556 | N   |
| SISUN8  | Solyc03g026110.2.1 | 7899519-7903299(-)   | 3  | 1461 | 486 | N   |
| SISUN9  | Solyc03g026440.2.1 | 9052195-9054923(+)   | 3  | 561  | 186 | N   |
| SISUN10 | Solyc03g026110.2.1 | 46466257-46469172(-) | 3  | 1410 | 469 | N   |
| SISUN11 | Solyc03g121760.2.1 | 63883128-63885625(-) | 3  | 1290 | 429 | N   |
| SISUN12 | Solyc04g016480.2.1 | 7305326-7308804(-)   | 4  | 1233 | 410 | N   |
| SISUN13 | Solyc04g016480.2.1 | 44467392-44470126(-) | 4  | 1185 | 394 | N   |
| SISUN14 | Solyc04g081210.2.1 | 62803374-62809165(+) | 4  | 2589 | 862 | N   |
| SISUN15 | Solyc05g007130.2.1 | 1694652-1699497(+)   | 5  | 1656 | 551 | N   |
| SISUN16 | Solyc06g052010.1.1 | 32163038-32167768(+) | 6  | 1194 | 397 | N   |
| SISUN17 | Solyc06g053450.2.1 | 32744659-3275125(+)  | 6  | 1779 | 592 | N   |
| SISUN18 | Solyc06g066430.2.1 | 38090484-38092311(-) | 6  | 1179 | 392 | N   |
| SISUN19 | Solyc08g007920.1.1 | 2425707-2427454(+)   | 8  | 705  | 234 | N   |
| SISUN20 | Solyc08g007930.1.1 | 2436580-2438211(+)   | 8  | 684  | 227 | N   |
| SISUN21 | Solyc08g014280.2.1 | 3966331-3970317(+)   | 8  | 1620 | 539 | N   |
| SISUN22 | Solyc08g062940.2.1 | 49582645-49584764(+) | 8  | 930  | 309 | N   |
| SISUN23 | Solyc08g080470.2.1 | 60928845-60932810(+) | 8  | 1500 | 499 | N   |
| SISUN24 | Solyc08g083240.2.1 | 62923263-62925544(-) | 8  | 1470 | 489 | N   |
| SISUN25 | Solyc09g007410.2.1 | 985216-988218 (-)    | 9  | 1452 | 483 | N   |
| SISUN26 | Solyc09g082560.2.1 | 63677616-63679791(-) | 9  | 1404 | 467 | N   |
| SISUN27 | Solyc10g005000.2.1 | 4134-5923 (-)        | 10 | 1185 | 394 | N   |
| SISUN28 | Solyc10g008790.2.1 | 2859728-2865652(-)   | 10 | 915  | 304 | N   |
| SISUN29 | Solyc10g084280.1.1 | 63223672-63226246(+) | 10 | 1437 | 478 | N   |
| SISUN30 | Solyc10g086060.1.1 | 64348811-64350952(-) | 10 | 1416 | 471 | N   |
| SISUN31 | Solyc11g071840.1.1 | 64348811-64350952(+) | 10 | 1347 | 448 | N   |
| SISUN32 | Solyc12g008520.1.1 | 1931971-1934807(+)   | 12 | 1230 | 409 | N   |
| SISUN33 | Solyc12g014130.1.1 | 4940650-4946027(+)   | 12 | 786  | 261 | N   |
| soybean |                    |                      |    |      |     |     |
| GmIQD1  | Glyma01g01030      | 681417-683646        | 1  | 1263 | 420 | N   |
| GmIQD2  | Glyma01g05100      | 4750065-4755456      | 1  | 1692 | 563 | N   |
| GmIQD3  | Glyma01g42620      | 53843322-53846963    | 1  | 1191 | 396 | N   |
| GmIQD4  | Glyma02g00710      | 502944-506146        | 1  | 1254 | 417 | N   |
| GmIQD5  | Glyma02g02370      | 1778568-1785636      | 2  | 1692 | 563 | N   |
| GmIQD6  | Glyma02g15590      | 14083370-14089609    | 2  | 1608 | 535 | N   |
| GmIQD7  | Glyma03g33560      | 41092523-41096935    | 2  | 1434 | 477 | N   |
| GmIQD8  | Glyma03g40630      | 46330165-46332185    | 3  | 1125 | 374 | N   |
| GmIQD9  | Glyma04g02830      | 2030287-2036251      | 3  | 2715 | 904 | N   |
| GmIQD10 | Glyma04g05520      | 4187757-4190317      | 4  | 1353 | 450 | N   |
| GmIQD11 | Glyma04g23760      | 27192306-27195532    | 4  | 1353 | 450 | N   |
| GmIQD12 | Glyma04g34150      | 40144241-40151603    | 4  | 1752 | 583 | N   |
| GmIQD13 | Glyma04g41380      | 47220698-47225472    | 4  | 1392 | 463 | N   |
| GmIQD14 | Glyma05g01240      | 785189-792757        | 4  | 1761 | 586 | N   |
| GmIQD15 | Glyma05g03450      | 2638386-2641896      | 5  | 1338 | 445 | N   |
| GmIQD16 | Glyma05g35920      | 39871246-39873985    | 5  | 1128 | 375 | N   |
| GmIQD17 | Glyma06g02841      | 1950849-1956820      | 5  | 2532 | 843 | N   |

|         |               |                   |    |      |     |     |
|---------|---------------|-------------------|----|------|-----|-----|
| GmIQD18 | Glyma06g05530 | 10606168-10611219 | 6  | 1353 | 450 | E.R |
| GmIQD19 | Glyma06g13470 | 3957759-3960421   | 6  | 1341 | 446 | N   |
| GmIQD20 | Glyma06g20341 | 16752231-16759304 | 6  | 1755 | 584 | N   |
| GmIQD21 | Glyma07g01040 | 607467-610485     | 6  | 1302 | 433 | N   |
| GmIQD22 | Glyma07g01760 | 1164144-1167157   | 7  | 1191 | 396 | N   |
| GmIQD23 | Glyma07g05680 | 4335391-4339373   | 7  | 1641 | 546 | N   |
| GmIQD24 | Glyma07g14910 | 14801071-14803234 | 7  | 1398 | 465 | C   |
| GmIQD25 | Glyma07g32531 | 37416802-37421879 | 7  | 873  | 290 | N   |
| GmIQD26 | Glyma07g32860 | 37753882-37759623 | 7  | 1602 | 533 | N   |
| GmIQD27 | Glyma08g03710 | 2630927-2633769   | 7  | 1311 | 436 | N   |
| GmIQD28 | Glyma08g20430 | 15453660-15456579 | 8  | 1266 | 421 | N   |
| GmIQD29 | Glyma08g21430 | 16271106-16273575 | 8  | 1209 | 402 | N   |
| GmIQD30 | Glyma08g40880 | 40742659-40748073 | 8  | 1644 | 547 | C   |
| GmIQD31 | Glyma09g26630 | 33163730-3316945  | 8  | 1449 | 482 | C   |
| GmIQD32 | Glyma09g30780 | 37552192-37557238 | 9  | 1305 | 434 | N   |
| GmIQD33 | Glyma09g35920 | 41794962-41798738 | 9  | 1407 | 468 | N   |
| GmIQD34 | Glyma10g00630 | 386683-389158     | 10 | 1272 | 423 | N   |
| GmIQD35 | Glyma10g05720 | 4477640-4481520   | 10 | 1425 | 474 | N   |
| GmIQD36 | Glyma10g35721 | 43974896-43978361 | 10 | 1452 | 483 | N   |
| GmIQD37 | Glyma10g38310 | 46118444-46123432 | 10 | 1395 | 464 | C   |
| GmIQD38 | Glyma10g39030 | 46764292-46767407 | 10 | 1410 | 469 | N   |
| GmIQD39 | Glyma11g20880 | 17714458-17717939 | 10 | 1374 | 457 | N   |
| GmIQD40 | Glyma12g01410 | 842971-846738     | 11 | 1383 | 460 | N   |
| GmIQD41 | Glyma12g31610 | 35181013-35188577 | 12 | 1269 | 422 | N   |
| GmIQD42 | Glyma12g35711 | 38833825-38837834 | 12 | 885  | 294 | N   |
| GmIQD43 | Glyma13g20070 | 23539750-23543840 | 12 | 1413 | 470 | N   |
| GmIQD44 | Glyma13g24070 | 27399608-27404534 | 13 | 774  | 257 | N   |
| GmIQD45 | Glyma13g30590 | 33154582-33158861 | 13 | 900  | 299 | N   |
| GmIQD46 | Glyma13g34700 | 36237460-36241896 | 13 | 1173 | 390 | N   |
| GmIQD47 | Glyma13g38800 | 39521853-39528595 | 13 | 1278 | 425 | N   |
| GmIQD48 | Glyma13g42440 | 42441870-42445047 | 13 | 1239 | 412 | N   |
| GmIQD49 | Glyma13g43031 | 42796469-42804226 | 14 | 1143 | 380 | N   |
| GmIQD50 | Glyma14g11050 | 9335703-9339095   | 14 | 1254 | 417 | N   |
| GmIQD51 | Glyma14g25860 | 31470493-31475301 | 15 | 1377 | 458 | N   |
| GmIQD52 | Glyma15g02370 | 1595640-1598698   | 15 | 1137 | 378 | N   |
| GmIQD53 | Glyma15g02940 | 2051157-2053854   | 15 | 1251 | 416 | C   |
| GmIQD54 | Glyma15g08660 | 6125483-6129362   | 16 | 927  | 308 | N   |
| GmIQD55 | Glyma16g02240 | 1759053-1762330   | 16 | 1653 | 550 | N   |
| GmIQD56 | Glyma16g22935 | 26564269-26565120 | 16 | 426  | 141 | C   |
| GmIQD57 | Glyma16g32161 | 35337880-35343544 | 17 | 1434 | 477 | C   |
| GmIQD58 | Glyma17g10660 | 8002515-8009332   | 17 | 1767 | 588 | N   |
| GmIQD59 | Glyma17g14000 | 10763173-10767584 | 17 | 1344 | 447 | N   |
| GmIQD60 | Glyma17g23770 | 23932487-23938307 | 17 | 1386 | 461 | N   |
| GmIQD61 | Glyma17g34520 | 38500561-38503843 | 18 | 1242 | 413 | N   |
| GmIQD62 | Glyma18g16130 | 16440695-16446996 | 19 | 1644 | 547 | N   |
| GmIQD63 | Glyma19g36270 | 43610551-43615073 | 19 | 1434 | 477 | N   |
| GmIQD64 | Glyma19g43300 | 48995941-48998264 | 20 | 1113 | 370 | N   |
| GmIQD65 | Glyma20g28800 | 37708013-37709907 | 20 | 1434 | 477 | N   |
| GmIQD66 | Glyma20g29550 | 38392614-38397440 | 20 | 1371 | 456 | C   |
| GmIQD67 | Glyma20g31810 | 40423269-40426995 | 20 | 1470 | 489 | C   |

**Table S2. The major MEME motif sequences and lengths in *PeIQDs* proteins.**

| Motif | Width | Conserved amino acid sequences                       |
|-------|-------|------------------------------------------------------|
| 1     | 41    | EWAAVKIQTAFRGYLARRALRALKGIVKLQALVRGHLVRKQ            |
| 2     | 28    | PSFPNYMANTESAKAKTRCQSAPRQRPD                         |
| 3     | 29    | NHFFYDPNDPNWGWNLERWMIICPWENR                         |
| 4     | 21    | ATTLHCMQALVRFQAQVRARR                                |
| 5     | 41    | MGEGWCDSIGSVEEIQAMLISRQEAAIKRERAMAYAFSHQW            |
| 6     | 15    | MGKAMKWKSVLFGK                                       |
| 7     | 41    | EKHKRNPFCFTSVPEDNVPDSQLSELEKVKRNLNKVTNSMA            |
| 8     | 41    | HRRRLSDGGDSNYERSPRIVEMDTCHLRCRSTRITSRYYP             |
| 9     | 41    | VTDGKPHTRKASYAMETESGKLKRNVRKCSAMTVEPFQTNM            |
| 10    | 50    | NWVTTGEKVNPTVFAPAVEIMPLQDIDNEDNVLGNDEEHRKEEP<br>LSNG |

**Table S3. Summary of the duplicated gene-pairs and determination of Ka and Ks values of the IQD family in moso bamboo, rice and *Brachypodium*.**

|                   | Ka     | Ks     | Ka/Ks | Duplication date (MY) |
|-------------------|--------|--------|-------|-----------------------|
| paralogous genes  |        |        |       |                       |
| PeIQD2-PeIQD29    | 0.0095 | 0.108  | 0.88  | 8.31                  |
| PeIQD4-PeIQD9     | 0.0978 | 0.1267 | 0.77  | 9.75                  |
| PeIQD5-PeIQD26    | 0.0486 | 0.1259 | 0.39  | 9.68                  |
| PeIQD10-PeIQD12   | 0.0723 | 0.1467 | 0.49  | 11.28                 |
| PeIQD11-PeIQD16   | 0.0156 | 0.1106 | 0.14  | 8.51                  |
| PeIQD14-PeIQD24   | 0.0285 | 0.1078 | 0.26  | 8.29                  |
| PeIQD18-PeIQD21   | 0.0573 | 0.0696 | 0.82  | 5.35                  |
| PeIQD19-PeIQD23   | 0.0745 | 0.1522 | 0.49  | 11.71                 |
| PeIQD20-PeIQD25   | 0.0582 | 0.151  | 0.39  | 11.62                 |
| orthologous genes |        |        |       |                       |
| BdIQD7-PeIQD29    | 0.4951 | 0.5457 | 0.91  | 41.99                 |
| BdIQD22-PeIQD3    | 0.1295 | 0.3274 | 0.4   | 25.81                 |
| OsIQD2-PeIQD28    | 0.0686 | 0.4269 | 0.16  | 32.84                 |
| OsIQD28-PeIQD22   | 0.1808 | 0.4878 | 0.37  | 37.52                 |
| OsIQD17-PeIQD7    | 0.3037 | 0.4114 | 0.74  | 31.6                  |
| OsIQD26-PeIQD27   | 0.1181 | 0.2601 | 0.45  | 20                    |
| OsIQD22-PeIQD13   | 0.106  | 0.2842 | 0.37  | 21.86                 |

**Table S4. The full length of PeIQD8 and PeCaM2 cDNAs.**

|                | length of cDNAs                                                                                                                                                                                                                                                                                                                                                                                                                                                                                                                                                                                                                                                                                                                                                                                                                                                                                                                                                                                                                                                                                                                                                                                                                                                                                        |
|----------------|--------------------------------------------------------------------------------------------------------------------------------------------------------------------------------------------------------------------------------------------------------------------------------------------------------------------------------------------------------------------------------------------------------------------------------------------------------------------------------------------------------------------------------------------------------------------------------------------------------------------------------------------------------------------------------------------------------------------------------------------------------------------------------------------------------------------------------------------------------------------------------------------------------------------------------------------------------------------------------------------------------------------------------------------------------------------------------------------------------------------------------------------------------------------------------------------------------------------------------------------------------------------------------------------------------|
| <i>PeIQD12</i> | <p>ATGGGGCGTGCCATGAGATGGCTCAAGAAGCTACTGACAGGCAGGAAGGGC<br/> GGGCACAAAGGCCTCAAGGAGAACCAGGTCGCAAGCGACTGGCGTAACGGG<br/> ACGGAGAGGGAGGAGAGGTGGATCTTTGTGAAGCAGCGGAAGAGCGGAGTT<br/> GATGGCGGCAGGCGGCCCTCGGAGGCCGCGGCGGCGGCGGCGGCGGCGGA<br/> GCCGTGCGAGGTCAGGCCATGCCATTGTGGTGAGGAAGATGCCAGACCTCG<br/> CGAGGACGAGGCGGCCGTCGTGATCCAGAAAGCCTTCAGGGGCTACCTGGC<br/> TAGGAAAGCGCTTCGCGCTCTCGTAGCACTTGTC AAGCTACAGGCTCTAGTC<br/> CGAGGCTACCTTGTGAGGAAGAAAGTCGCCACGACTCTACACAGGTTGCAG<br/> CGCTCATGCGGCTGCAGGCCGATTCTTACGTCAAGAGAGCTTCCTACCGGA<br/> AATCCATGGAACAAGAGAGGATCATCACGCAAGAAGCCCGGTGAAGCCGT<br/> CGGCGACGCCGCGCACCCGTCGGAGGCTCTCCGACAGCACGGACTCCAACT<br/> ACGAGCGCAGCCCGGAATCGTCGAGATGGACACGTGCCACCTCCGCTCCC<br/> GGTCCACCCGGATCGTGAGCAGCCGGTACGCCCCGACCACTCGTCGGACCC<br/> CCTTACCCCGTCTCGCGCCGTCGTGCTCGCCGGTGTCCAGCAAGCAGCCC<br/> CCACGGCTCTCAATCCAGCGGTGCCGCGAGCGGGACCCCAGGCAAGCCAAG<br/> ACTGCGCAGAACACGCCTCGCTGCTTCGTGCCCGCTCCGCCGCACGACTTGC<br/> CCGCCAAGAGCGTCGACGGCCTGACGTGCGCGGCGGCTCTCGCACCCGGGACG<br/> TGATCGTCAGCCCGCGCTACATGGAGGATACGGCCTCGTCCGCGGGCAGGA<br/> CGCAGTGCCAGAGCGCGCCGAGGCAGCGGCAGGCCGAGGCGCCGCGCCGAGG<br/> GCGAGCCTGACCCGGTCCGGGTCGAGGAAGTCGTGCTCGCAGATGCATGAC<br/> AGCGCCTTCTGCTTCCAGTGCTCGGTTGCCACCCAGACGGGCTGCTCCGAGC<br/> TCAGCGACGAGGCGGCCAGAGATTACTACCTGGACAGGATGTGGTGA</p> |
| <i>PeCaM2</i>  | <p>ATGGCGGACCAGCTCACCGACGAGCAGATCGCCGAGTTCAAGGAGGCCTTC<br/> AGCCTCTTCGACAAGGACGGCGACGGTTGCATCACTACTAAGGAGCTTGGA<br/> ACCGTGATGCGATCCCTTGGGCAGAACCTACTGAGGCAGAGCTGCAGGAC<br/> ATGATCAATGAGGTTGATGCTGATGGCAATGGGACCATCGACTTCCCAGAGT<br/> TCCTGAACCTGATGGCAAGGAAGATGAAGGATACCGACTCTGAGGAGGAGC<br/> TCAAGGAGGCCTTCCGTGTCTTTGACAAGGACCAGAACGGTTTCATCTCGGC<br/> TGCTGAGCTCCGCCATGTCATGACCAACCTTGGGGAGAAGCTGACTGATGAG<br/> GAAGTTGATGAGATGATCCGCGAGGCCGATGTGGATGGCGATGGCCAGATC<br/> AACTATGATGAGTTCGTCAAGGTCATGATGGCCAAGTGA</p>                                                                                                                                                                                                                                                                                                                                                                                                                                                                                                                                                                                                                                                                                                                                                                               |

**Table S5. Summary of abiotic-stress inducible cis-elements is in the promoter**

**regions of IQD genes in moso bamboo.** Cis-elements with larger numbers are highlighted in bold. Motif S000153 (CCGAC) overlaps with motif S000402 (ACCGAC) and S000418 (RCCGAC), and motif S000415 ACGT overlaps with motif S000414 (ACGTG) and S000133 (CCACGTGG), so the total number of motifs was based on the specific position of motifs on the promoter regions.

| Abiotic stress | Gene name           | motif sequence | <i>PeIQD1</i> | <i>PeIQD3</i> | <i>PeIQD4</i> | <i>PeIQD5</i> | <i>PeIQD6</i> | <i>PeIQD7</i> | <i>PeIQD27</i> |
|----------------|---------------------|----------------|---------------|---------------|---------------|---------------|---------------|---------------|----------------|
|                | <i>cis</i> -element |                |               |               |               |               |               |               |                |
| Drought-stress | S000133             | CCACGTGG       | 0             | 0             | 0             | 0             | 0             | 0             | 0              |
|                | S000153             | CCGAC          | 0             | <b>5</b>      | 1             | 2             | 1             | 1             | <b>9</b>       |
|                | S000174             | CACATG         | 0             | 2             | 1             | 2             | 0             | 1             | 1              |
|                | S000175             | CTAACCA        | 0             | 0             | 0             | 0             | 0             | 2             | 1              |
|                | S000176             | CNGTTR         | 4             | 2             | 1             | 3             | <b>8</b>      | 0             | 2              |
|                | S000177             | TAACTG         | 2             | 1             | 0             | 0             | 1             | 0             | 0              |
|                | S000402             | ACCGAC         | 0             | 0             | 0             | 0             | 0             | 0             | 0              |
|                | S000408             | WAACCA         | 3             | 3             | 2             | 2             | 3             | 3             | 3              |
|                | S000413             | CATGTG         | 0             | 2             | 1             | 2             | 0             | 0             | 1              |
|                | S000414             | ACGTG          | 1             | 2             | 0             | 2             | 4             | 2             | <b>7</b>       |
|                | S000415             | ACGT           | <b>6</b>      | <b>10</b>     | 4             | <b>6</b>      | <b>8</b>      | <b>10</b>     | <b>18</b>      |
|                | S000418             | RCCGAC         | 0             | 0             | 1             | 0             | 0             | 1             | 4              |
|                | total               |                | 16            | 27            | 12            | 17            | 25            | 20            | 46             |
| Wound-stress   | S000244             | AACGTGT        | 0             | 0             | 0             | 0             | 0             | 0             | 0              |
|                | S000444             | AGATCCAA       | 0             | 0             | 0             | 0             | 0             | 0             | 1              |
|                | S000457             | TGACY          | 2             | 1             | 2             | 3             | 4             | <b>13</b>     | <b>6</b>       |
|                | total               |                | 2             | 1             | 2             | 3             | 4             | 13            | 7              |

| Abiotic stress | Gene name           | motif sequence | <i>PeIQD</i><br>8 | <i>PeIQD</i><br>9 | <i>PeIQD</i><br>10 | <i>PeIQD</i><br>11 | <i>PeIQD</i><br>28 | <i>PeIQD</i><br>12 | <i>PeIQD</i><br>13 |
|----------------|---------------------|----------------|-------------------|-------------------|--------------------|--------------------|--------------------|--------------------|--------------------|
|                | <i>cis</i> -element |                |                   |                   |                    |                    |                    |                    |                    |
| Drought-stress | S000133             | CCACGTGG       | 0                 | 0                 | 0                  | 0                  | 0                  | 0                  | 0                  |
|                | S000153             | CCGAC          | 2                 | 2                 | 0                  | 0                  | 1                  | <b>5</b>           | 0                  |
|                | S000174             | CACATG         | 0                 | 1                 | 1                  | 0                  | 1                  | 2                  | 3                  |
|                | S000175             | CTAACCA        | 0                 | 0                 | 0                  | 0                  | 0                  | 0                  | 0                  |
|                | S000176             | CNGTTR         | <b>5</b>          | 4                 | <b>6</b>           | 4                  | <b>7</b>           | <b>9</b>           | 4                  |
|                | S000177             | TAACTG         | 1                 | 0                 | 0                  | 0                  | 0                  | 1                  | 0                  |
|                | S000402             | ACCGAC         | 2                 | 1                 | 0                  | 0                  | 1                  | 0                  | 0                  |
|                | S000408             | WAACCA         | 1                 | 4                 | <b>5</b>           | 1                  | 3                  | 1                  | 2                  |
|                | S000413             | CATGTG         | 0                 | 1                 | 1                  | 0                  | 1                  | 2                  | 3                  |
|                | S000414             | ACGTG          | 3                 | 2                 | 3                  | 1                  | 2                  | 2                  | <b>5</b>           |
|                | S000415             | ACGT           | <b>6</b>          | <b>8</b>          | <b>18</b>          | 1                  | <b>14</b>          | <b>6</b>           | <b>22</b>          |
|                | S000418             | RCCGAC         | 2                 | 1                 | 0                  | 4                  | 1                  | 4                  | 0                  |
|                | total               |                | 22                | 24                | 34                 | 11                 | 31                 | 32                 | 39                 |
| Wound-stress   | S000244             | AACGTGT        | 0                 | 0                 | 0                  | 0                  | 0                  | 0                  | 0                  |
|                | S000444             | AGATCCAA       | 0                 | 0                 | 0                  | 0                  | 0                  | 1                  | 0                  |
|                | S000457             | TGACY          | <b>7</b>          | <b>15</b>         | <b>5</b>           | 2                  | <b>6</b>           | <b>5</b>           | <b>9</b>           |
|                |                     | total          | 7                 | 15                | 5                  | 2                  | 6                  | 6                  | 9                  |

| Abiotic stress | Gene name           | motif sequence | <i>PeIQD</i><br>14 | <i>PeIQD</i><br>15 | <i>PeIQD</i><br>16 | <i>PeIQD</i><br>17 | <i>PeIQD</i><br>18 | <i>PeIQD</i><br>19 | <i>PeIQD</i><br>29 |
|----------------|---------------------|----------------|--------------------|--------------------|--------------------|--------------------|--------------------|--------------------|--------------------|
|                | <i>cis</i> -element |                |                    |                    |                    |                    |                    |                    |                    |
| Drought-stress | S000133             | CCACGTGG       | 0                  | 0                  | 0                  | 0                  | 0                  | 0                  | 0                  |
|                | S000153             | CCGAC          | 1                  | 3                  | 4                  | 3                  | <b>6</b>           | <b>5</b>           | 1                  |
|                | S000174             | CACATG         | 2                  | 0                  | 2                  | 0                  | 0                  | 3                  | 3                  |
|                | S000175             | CTAACCA        | 1                  | 2                  | 0                  | 0                  | 2                  | 0                  | 1                  |
|                | S000176             | CNGTTR         | 4                  | 3                  | 3                  | 3                  | <b>8</b>           | <b>5</b>           | <b>7</b>           |
|                | S000177             | TAACTG         | 2                  | 0                  | 0                  | 1                  | 0                  | 0                  | 0                  |
|                | S000402             | ACCGAC         | 0                  | 0                  | 1                  | 1                  | 4                  | 0                  | 1                  |
|                | S000408             | WAACCA         | 1                  | 3                  | 1                  | 2                  | <b>6</b>           | 0                  | 3                  |
|                | S000413             | CATGTG         | 1                  | 0                  | 2                  | 0                  | 0                  | 3                  | 3                  |
|                | S000414             | ACGTG          | 2                  | 0                  | 1                  | 0                  | 4                  | 1                  | <b>5</b>           |
|                | S000415             | ACGT           | <b>10</b>          | 4                  | 4                  | 4                  | 0                  | <b>8</b>           | <b>16</b>          |
|                | S000418             | RCCGAC         | 1                  | 3                  | 2                  | 1                  | 4                  | 2                  | 1                  |
|                | total               |                | 25                 | 18                 | 20                 | 15                 | 34                 | 27                 | 41                 |
| Wound-stress   | S000244             | AACGTGT        | 0                  | 0                  | 0                  | 0                  | 1                  | 1                  | 0                  |
|                | S000444             | AGATCCAA       | 0                  | 0                  | 0                  | 0                  | 0                  | 0                  | 0                  |
|                | S000457             | TGACY          | 2                  | 0                  | <b>8</b>           | 3                  | <b>6</b>           | <b>8</b>           | <b>7</b>           |
|                | total               |                | 2                  | 0                  | 8                  | 3                  | 7                  | 9                  | 7                  |



| Abiotic stress | Gene name           | motif sequence | <i>PeIQD</i> | <i>PeIQD</i> | <i>PeIQD</i> | <i>PeIQD</i> | <i>PeIQD</i> | <i>PeIQD</i> |
|----------------|---------------------|----------------|--------------|--------------|--------------|--------------|--------------|--------------|
|                | <i>cis</i> -element |                | 21           | 20           | 22           | 23           | 24           | 25           |
| Drought-stress | S000133             | CCACGTGG       | 0            | 0            | 0            | 0            | 0            | 0            |
|                | S000153             | CCGAC          | 3            | 1            | 4            | 3            | 4            | 2            |
|                | S000174             | CACATG         | 0            | 3            | 3            | 3            | 2            | 1            |
|                | S000175             | CTAACCA        | 0            | 0            | 0            | 0            | 1            | 0            |
|                | S000176             | CNGTTR         | 4            | <b>5</b>     | <b>6</b>     | <b>9</b>     | <b>5</b>     | 3            |
|                | S000177             | TAACTG         | 0            | 0            | 2            | 1            | 2            | 1            |
|                | S000402             | ACCGAC         | 0            | 0            | 3            | 0            | 3            | 0            |
|                | S000408             | WAACCA         | 1            | 3            | 1            | 3            | 1            | 4            |
|                | S000413             | CATGTG         | 0            | 3            | 3            | 3            | 2            | 1            |
|                | S000414             | ACGTG          | 4            | <b>6</b>     | <b>7</b>     | 2            | <b>5</b>     | 3            |
|                | S000415             | ACGT           | <b>16</b>    | <b>14</b>    | <b>16</b>    | 4            | <b>14</b>    | <b>6</b>     |
|                | S000418             | RCCGAC         | 0            | 0            | 4            | 0            | 3            | 2            |
|                | total               |                | 28           | 35           | 49           | 28           | 42           | 23           |
| Wound-stress   | S000244             | AACGTGT        | 0            | 0            | 0            | 0            | 0            | 0            |
|                | S000444             | AGATCCAA       | 0            | 0            | 0            | 0            | 0            | 0            |
|                | S000457             | TGACY          | 2            | <b>5</b>     | <b>7</b>     | <b>5</b>     | <b>6</b>     | <b>9</b>     |
|                | total               |                | 2            | 5            | 7            | 5            | 6            | 9            |

**Table S6. Primers used in the paper..**

| <b>Primers for qRT-PCR analysis</b> |             |                             |        |       |       |                |                   |
|-------------------------------------|-------------|-----------------------------|--------|-------|-------|----------------|-------------------|
| Gene                                | Orientation | Primer Sequence(5'→3')      | Length | Tm    | GC%   | Product length | Efficiency values |
| PeIQD1                              | Forward     | GGCCGCGCACGATAGA            | 16     | 59.2  | 42.8  | 144            | 92%               |
|                                     | Reverse     | TCTTGATGGGAGAAGGCATAGG      | 22     | 60.1  | 50    |                |                   |
| PeIQD2                              | Forward     | GCGGGTAGGTGGCTCAGAA         | 19     | 61.9  | 40.91 | 17             | 105.60%           |
|                                     | Reverse     | GATTGGCTGTCGGCTTTGTC        | 20     | 59.8  | 55.6  |                |                   |
| PeIQD3                              | Forward     | AACCGAAGCAGAAACCGAAAC       | 21     | 58    | 47.6  | 158            | 110.10%           |
|                                     | Reverse     | CTCCCTGCCAGCCATCTC          | 19     | 61.9  | 47.8  |                |                   |
| PeIQD4                              | Forward     | GAGGCATGAGGGTGAATTA         | 21     | 58    | 47.6  | 97             | 91.10%            |
|                                     | Reverse     | GCTGCTGGTGAGAAAGAGCAT       | 21     | 60    | 52.4  |                |                   |
| PeIQD5                              | Forward     | GGCAGGCTGCAGAATCATTAC       | 21     | 60    | 52.4  | 124            | 90.30%            |
|                                     | Reverse     | GATGTGCCCGGACTAGACCTT       | 21     | 61.9  | 54.5  |                |                   |
| PeIQD6                              | Forward     | TGACTGGGTTTGGGTTCTTTG       | 21     | 55.2  | 33.33 | 118            | 103.60%           |
|                                     | Reverse     | GAACAACGCAAGCATTGCTAA       | 22     | 61.64 | 52.38 |                |                   |
| PeIQD7                              | Forward     | ACCTAGTGGGCATTTTGGATTC      | 22     | 58.2  | 45.5  | 119            | 101.70%           |
|                                     | Reverse     | CTTCCCAAATTCGTTTCCGTATC     | 23     | 58.4  | 43.5  |                |                   |
| PeIQD8                              | Forward     | CGGGACTCCAACCTGATAA         | 20     | 59.8  | 55    | 169            | 105.50%           |
|                                     | Reverse     | GGCAGGACGGGTCAGTTTT         | 19     | 59.7  | 51.9  |                |                   |
| PeIQD9                              | Forward     | TGGGAGAGTCGCCTTATGGA        | 20     | 59.8  | 55    | 95             | 92.50%            |
|                                     | Reverse     | CTGAACACCGCAATTGGT          | 19     | 57.6  | 52.6  |                |                   |
| PeIQD10                             | Forward     | CGGGACGGAGAGGGAGAA          | 18     | 61.9  | 41.67 | 136            | 93%               |
|                                     | Reverse     | GCTGTCAACTCCGCTCTTCCT       | 21     | 61.9  | 39.13 |                |                   |
| PeIQD11                             | Forward     | AAGAGCAAGCAGCCGTCAAG        | 20     | 59.8  | 55    | 116            | 107.50%           |
|                                     | Reverse     | CCCACGCTGCCAGATAACC         | 19     | 61.9  | 53.2  |                |                   |
| PeIQD12                             | Forward     | CGCCACGACTCTACACAGGTT       | 21     | 61.9  | 41.7  | 135            | 109.70%           |
|                                     | Reverse     | GTAGGAAGCTCTCTTGACGTAAGAATC | 27     | 62    | 44.4  |                |                   |
| PeIQD13                             | Forward     | CAGCGTTTGCTTTGATTGGA        | 20     | 60.32 | 45.83 | 165            | 104.20%           |
|                                     | Reverse     | CCCTTGGCTCAATCTTGCA         | 19     | 59.06 | 50    |                |                   |
| PeIQD14                             | Forward     | CCGTCAGTCCAAGCTACATG        | 21     | 61.9  | 51.5  | 134            | 94.10%            |
|                                     | Reverse     | CCCTGGAGGCGGGACTTA          | 18     | 61.9  | 46.7  |                |                   |
| PeIQD15                             | Forward     | GTGGATGGAGGCATGATGTG        | 20     | 59.8  | 41.67 | 110            | 108.30%           |
|                                     | Reverse     | GTTTCTGGCAGTGAAACTGGTAA     | 23     | 60.2  | 47.8  |                |                   |
| PeIQD16                             | Forward     | AAGAGCAAGCAGCCGTCAA         | 19     | 57.6  | 52.6  | 157            | 108.10%           |

|         |         |                           |    |      |       |     |         |
|---------|---------|---------------------------|----|------|-------|-----|---------|
|         | Reverse | TGCCCCGACGAGCCAGATA       | 18 | 59.6 | 51.8  |     |         |
| PeIQD17 | Forward | AACAATGAGCCTTTTGAAATCCA   | 23 | 54.8 | 34.8  | 126 | 103.90% |
|         | Reverse | GGAGCTATGCGATCAGTTTTGG    | 22 | 60.1 | 50    |     |         |
| PeIQD18 | Forward | TTCGTTCCCCACCAAATCA       | 19 | 55.4 | 47.45 | 144 | 110.00% |
|         | Reverse | CCTTGGCGGAACCTGGAGTATT    | 21 | 60   | 50    |     |         |
| PeIQD19 | Forward | GCCCAGGCTCGTGCAGATA       | 18 | 61.9 | 45    | 129 | 106.80% |
|         | Reverse | TTTTCCGTGCCACTTGGTTT      | 20 | 55.8 | 50    |     |         |
| PeIQD20 | Forward | TTTTCCGTGCCACTTGGTTT      | 18 | 55   | 57.9  | 140 | 94.20%  |
|         | Reverse | GCAGCGACAACGGCTTTAC       | 19 | 59.7 | 50    |     |         |
| PeIQD21 | Forward | CTGCCTTGCCATTCATTGTG      | 20 | 57.8 | 45    | 142 | 90.50%  |
|         | Reverse | TCCATGCATCCGACGATTTA      | 20 | 55.8 | 48.6  |     |         |
| PeIQD22 | Forward | CGCGGTCACAGGTCTTCAG       | 19 | 61.9 | 52    | 127 | 91.30%  |
|         | Reverse | CTCATCTCGACACGTTGGA       | 20 | 59.8 | 55.6  |     |         |
| PeIQD23 | Forward | CTGCTGTCAAGCGCGAAA        | 18 | 57.3 | 57.9  | 99  | 91.50%  |
|         | Reverse | GAACCAGGTTGCCGCTGAT       | 19 | 59.7 | 45.54 |     |         |
| PeIQD24 | Forward | CCAGCCCCCGTCAA            | 15 | 59   | 40    | 241 | 107.10% |
|         | Reverse | TTCACAAGGATTGGTGTCACTTTAG | 25 | 58.7 | 37.5  |     |         |
| PeIQD25 | Forward | CGGCCGTCATGATTCAGAA       | 19 | 57.6 | 52    | 169 | 103.40% |
|         | Reverse | ACAAGTGATTTGAGAGCACGAAGT  | 24 | 58.6 | 41.7  |     |         |
| PeIQD26 | Forward | TCGAACCATAAGGATCTTGTGAAAT | 25 | 57.1 | 36    | 80  | 108.90% |
|         | Reverse | TGCAGCCTGCCTCCTAACTAG     | 21 | 61.9 | 57.1  |     |         |
| PeIQD27 | Forward | CCCAAACGAACTGGAAATGTG     | 21 | 58.1 | 45    | 139 | 106.50% |
|         | Reverse | ACCCCGGACCCAATAACAG       | 19 | 61.9 | 55    |     |         |
| PeIQD28 | Forward | CCCGTGCCATCTCAATCC        | 18 | 59.6 | 51.4  | 118 | 91.90%  |
|         | Reverse | CTCGGTGGACGGCTTGAC        | 18 | 61.9 | 56.7  |     |         |
| PeIQD29 | Forward | GGACCGTCATCGGCATTG        | 18 | 59.6 | 61.1  | 118 | 107.20% |
|         | Reverse | GAGCCTTCCTCGCCAGGTA       | 19 | 61.9 | 63.2  |     |         |

---

### Primers for Yeast two-hybrid assay

|        |         |                                |
|--------|---------|--------------------------------|
| PeIQD8 | Forward | GGGTACCATGTTGAGTTACAGGCCTGAATG |
|        | Reverse | GCTCTAGATCATTGTGCGCTGCTTCCAC   |

---

### Primers for site-specific mutagenesis

|                       |         |                                   |
|-----------------------|---------|-----------------------------------|
| PeIQD8Del<br>1112-113 | Forward | GTAACCTCGGAAGGCGGTCTTTATTGCTGCAAG |
|                       | Reverse | CTGGCAAGAAGAGCACTGCGAGCATTAAAGAGG |
| PeIQD8I1<br>2T        | Forward | CTGGCAAGAAGAGCACTGCGAGCATTAAAGAGG |
|                       | Reverse | GTAACCTCGGAAGGCGGTTTGGGTCTTTATTGC |

---
